# Supplementary material for: Ultrasensitive detection of sulfide ions through interactions between sulfide ions and Au(iii) quenching the fluorescence of chitosan microspheres functionalized with rhodamine B and modified with Au(iii)
Source: Royal Society of Chemistry journal article supplement (doi:10.1039/c6ra04407g), 2016-01-01
Supplement: c6ra04407g1.pdf [file c6ra04407g1.pdf]

## Supplementary information (ESI)

**Ultrasensitive detection of sulfide ions through interactions between sulfide ions and Au(III) quenching the fluorescence of chitosan microspheres functionalized with rhodamine B and modified with Au(III)**

Jinshui Liu\*, Wenxiu Liu, Qianqian Ji, Bin Wang, Meijiao Xu

*College of Chemistry and Materials Science, The Key Laboratory of Functional Molecular Solids, Ministry of Education, Anhui Key Laboratory of Chemo/Biosensing, Anhui Laboratory of Molecule-based Materials, Anhui Normal University, Wuhu 241000, PR China*

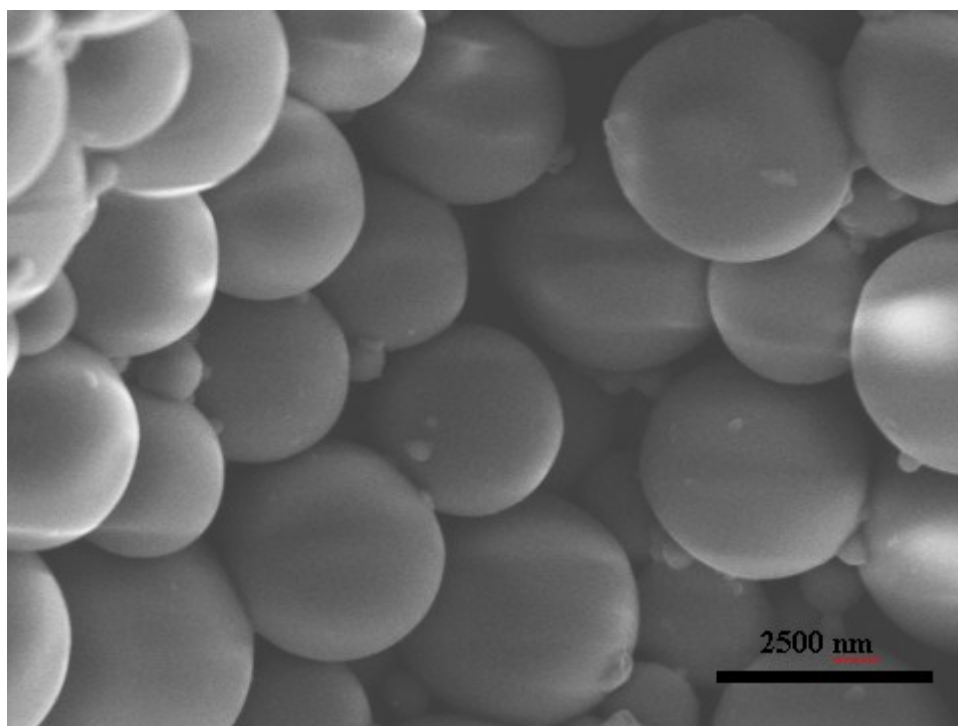

**Fig. S1** Scanning electron microscopy images of the chitosan microspheres (CSM)

---

\* Corresponding author. E-mail: [jsliu@sina.com](mailto:jsliu@sina.com)

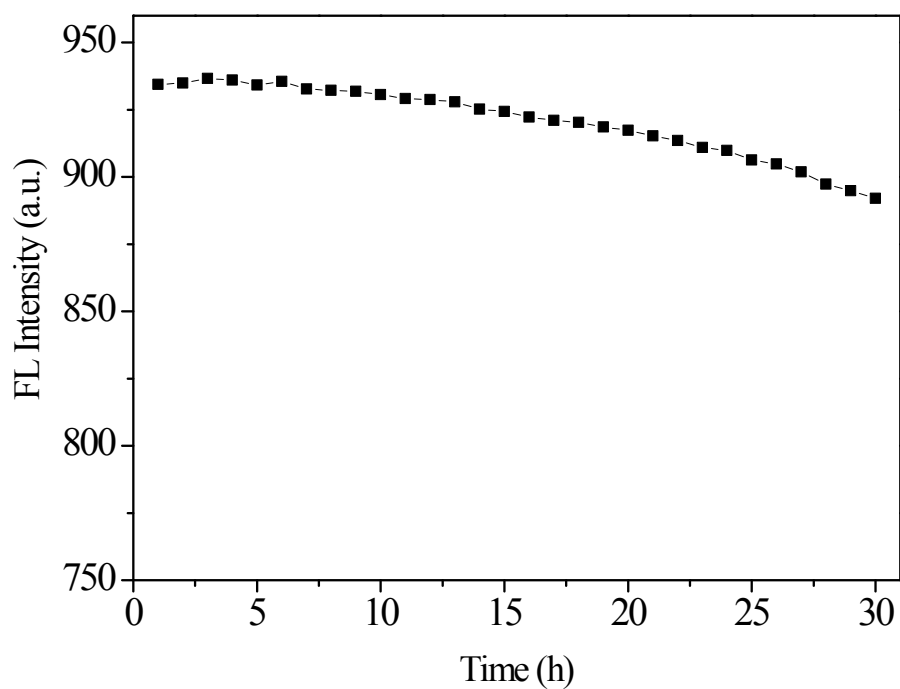

**Fig. S2** Photostability of  $0.04 \text{ g L}^{-1}$  chitosan microspheres functionalized with rhodamine B (RB-CSM) in solution at pH 5.3

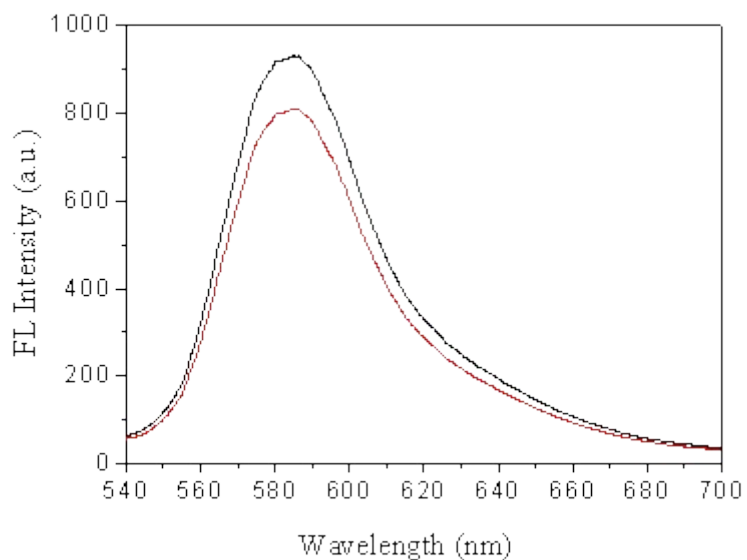

**Fig. S3** Fluorescence emission spectra of  $0.04 \text{ g L}^{-1}$  chitosan microspheres functionalized with rhodamine B (RB-CSM) in solution at pH 5.3 in (a) the absence of Au(III) and (b)  $4.0 \mu\text{mol L}^{-1}$  Au(III)

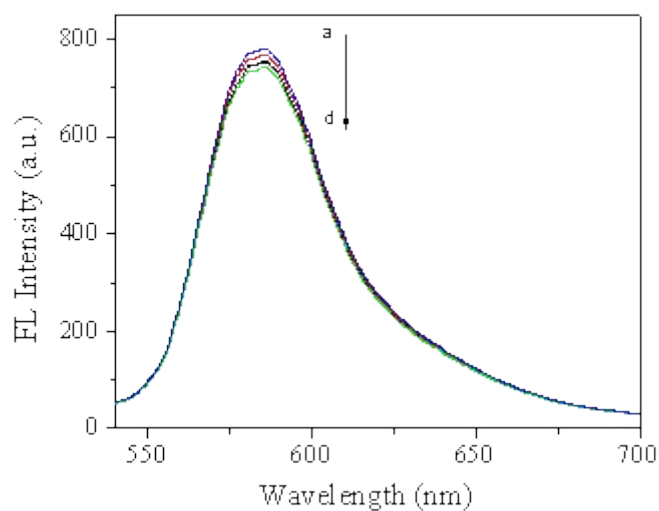

**Fig. S4** Fluorescence emission spectra of 0.04 g L<sup>-1</sup> chitosan microspheres functionalized with rhodamine B (RB-CSM) in PBS at pH 5.3 with sulfide ions at (a) 0 μmol L<sup>-1</sup>, (b) 0.01 μmol L<sup>-1</sup>, (c) 1.0 μmol L<sup>-1</sup>, and (d) 100 μmol L<sup>-1</sup>

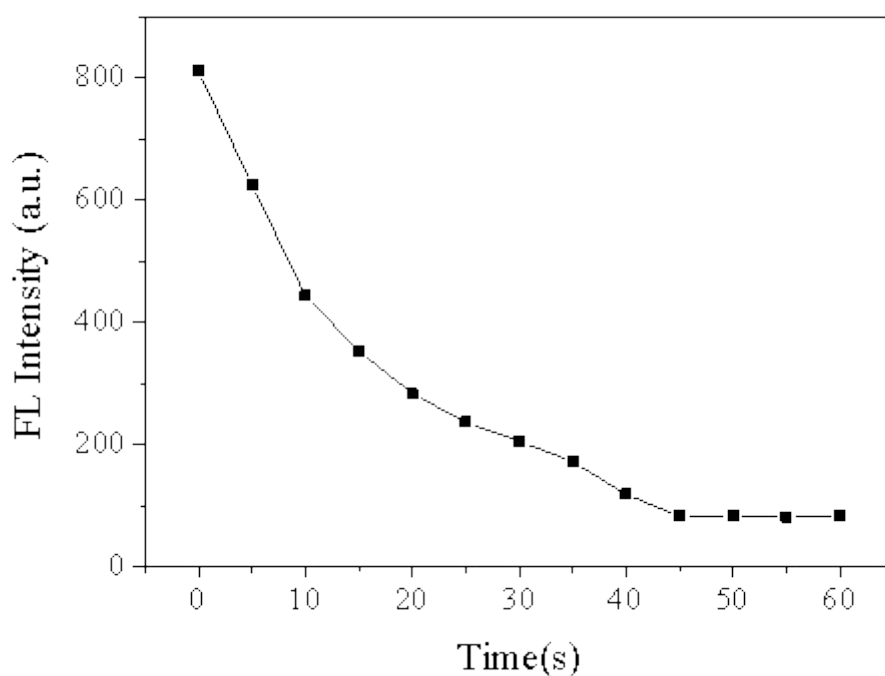

**Fig. S5** Fluorescence quenching of 0.04 g L<sup>-1</sup> chitosan microspheres functionalized with rhodamine B (RB-CSM) with  $4.0 \times 10^{-6}$  mol L<sup>-1</sup> AuCl<sub>4</sub><sup>-</sup> and 20 nmol L<sup>-1</sup> sulfide ions in PBS at pH 5.3 as a function of time

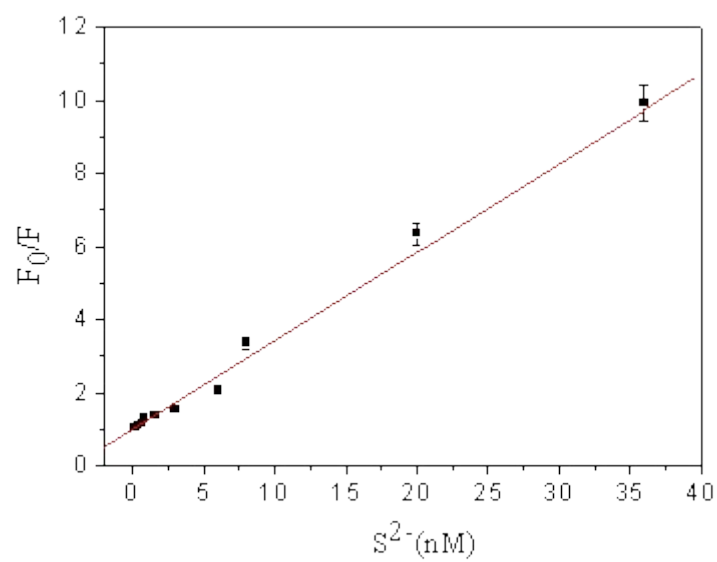

**Fig. S6** Fluorescence intensity plotted against the sulfide ion concentration. The calibration equation was  $F_0/F = 0.9864 + 0.24322 [S^{2-}]$ , and the correlation coefficient ( $R^2$ ) was 0.982.
